# Supplementary material for: Intermittent fasting promotes adipose thermogenesis and metabolic homeostasis via VEGF-mediated alternative activation of macrophage
Source: PubMed Central journal article supplement (PMC5674160; doi:10.1038/cr.2017.126), 2017-10-17
Supplement: cr2017126x2.pdf [file cr2017126x2.pdf]

## Supplementary information, Figure S2

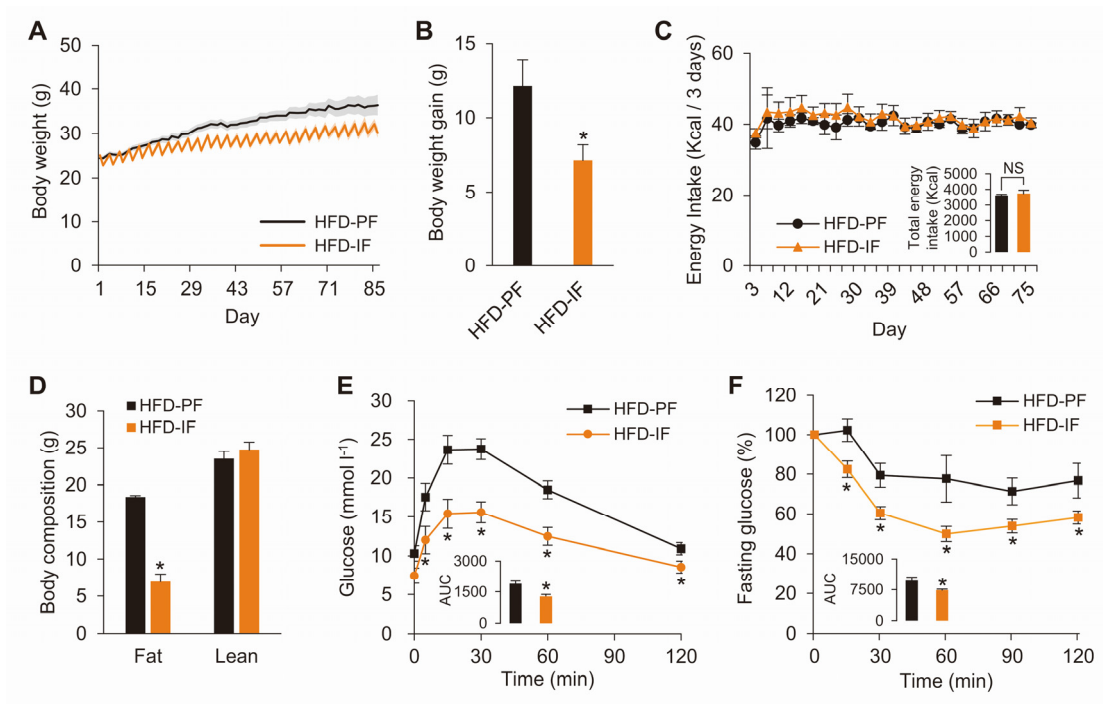

**Figure S2 The IF-mediated metabolic benefits are independent of energy intake – pair feeding study.** (A) Body weight measurement during 12 weeks of IF compared to PF mice fed HFD. (B) Body weight gain. (C) Changes of energy intake during 12 weeks of IF and pair-feeding (PF) cycles. An inset shows accumulated energy intake during the IF cycles. (D) Body composition showing fat and lean mass. (E) GTT in HFD-PF and HFD-IF mice. An inset graph shows AUC. (F) ITT in HFD-PF and HFD-IF mice. An inset graph shows AUC. (PF: n = 6 and IF: n = 6); two-tailed unpaired Student's *t*-test; \**P* < 0.05 vs. HFD-PF. NS, not significant.
