# Supplementary material for: Intermittent fasting promotes adipose thermogenesis and metabolic homeostasis via VEGF-mediated alternative activation of macrophage
Source: PubMed Central journal article supplement (PMC5674160; doi:10.1038/cr.2017.126), 2017-10-17
Supplement: cr2017126x4.pdf [file cr2017126x4.pdf]

# Supplementary information, Figure S4

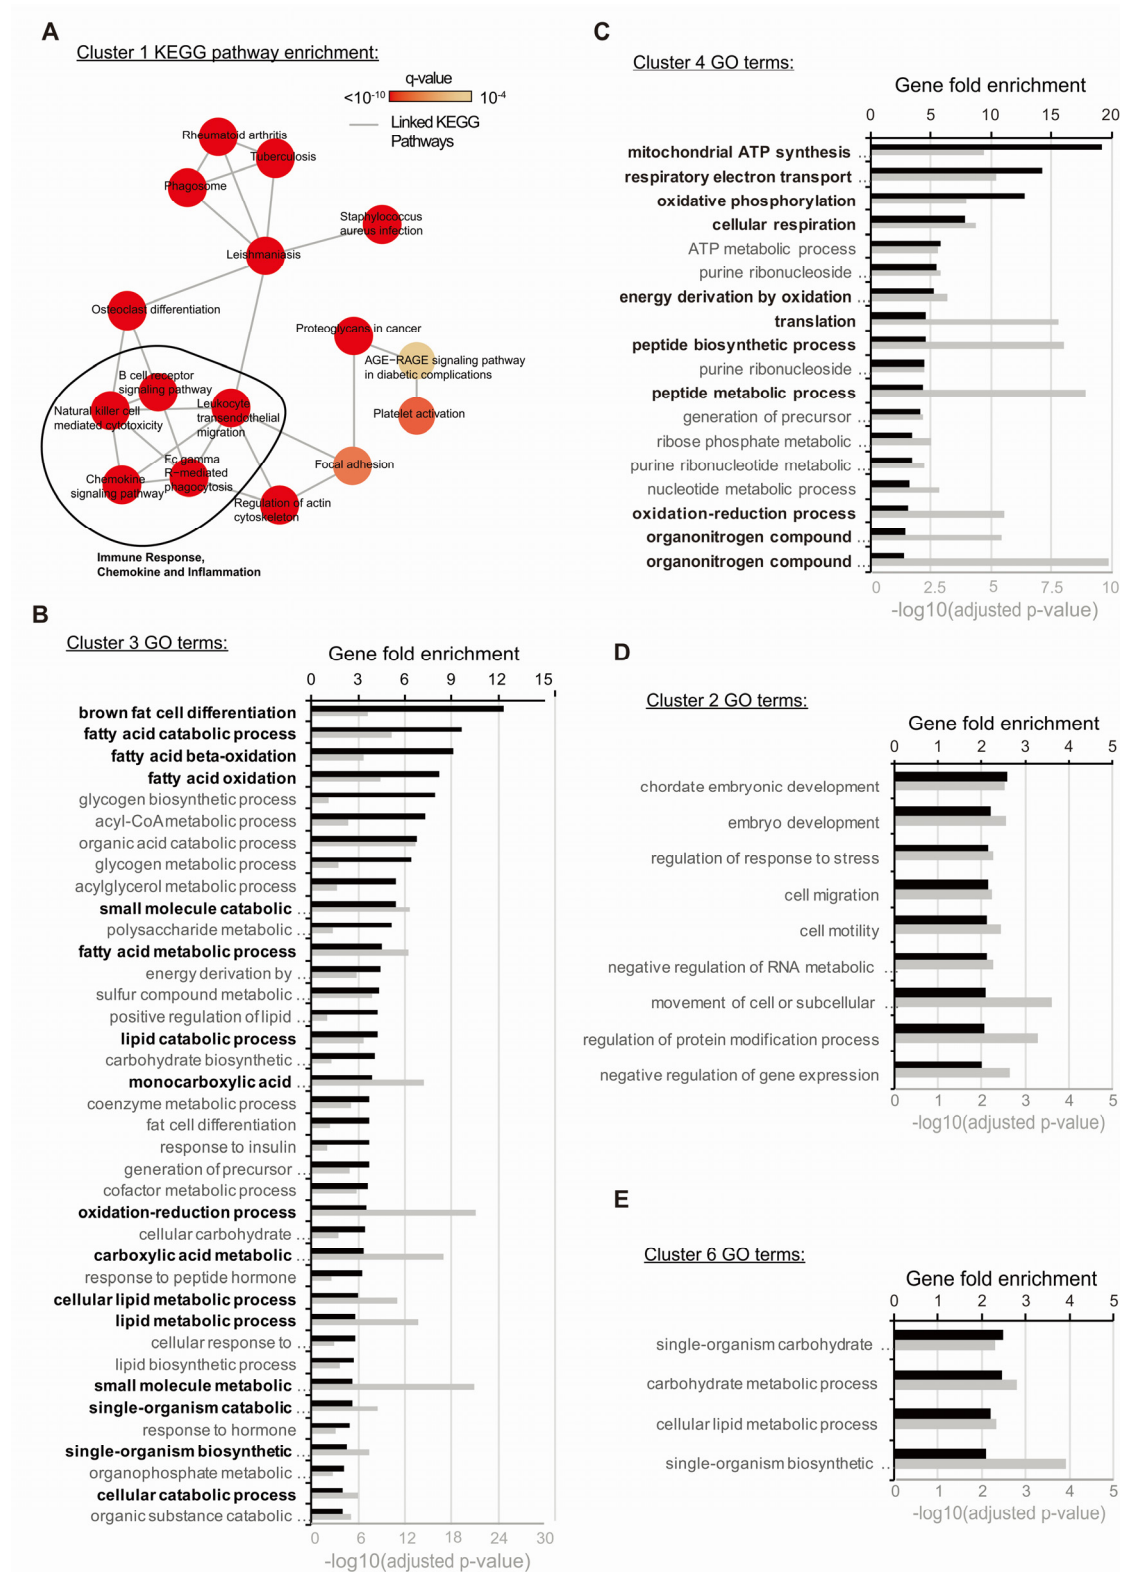

**Figure S4 Pathway and GO term analyses on WAT upon IF.** (A) KEGG pathway enrichment of the cluster 1 (i.e., higher in HFD-AL mice). (B) GO term analysis of the cluster 3 (i.e., lower in HFD-AL mice). (C) GO term analysis of the cluster 4 (i.e., higher in ND mice). (D) GO term analysis of the cluster 2 (i.e., lower in HFD-IF mice). (E) GO term analysis of the cluster 6 (i.e., higher in HFD-IF mice). GO terms with adjusted  $P$ -values  $< 10^{-6}$  are in bold. Adjusted  $P$ -values were calculated based on Bonferroni correction method.
