# Supplementary material for: Intermittent fasting promotes adipose thermogenesis and metabolic homeostasis via VEGF-mediated alternative activation of macrophage
Source: PubMed Central journal article supplement (PMC5674160; doi:10.1038/cr.2017.126), 2017-10-17
Supplement: cr2017126x7.pdf [file cr2017126x7.pdf]

## Supplementary information, Figure S7

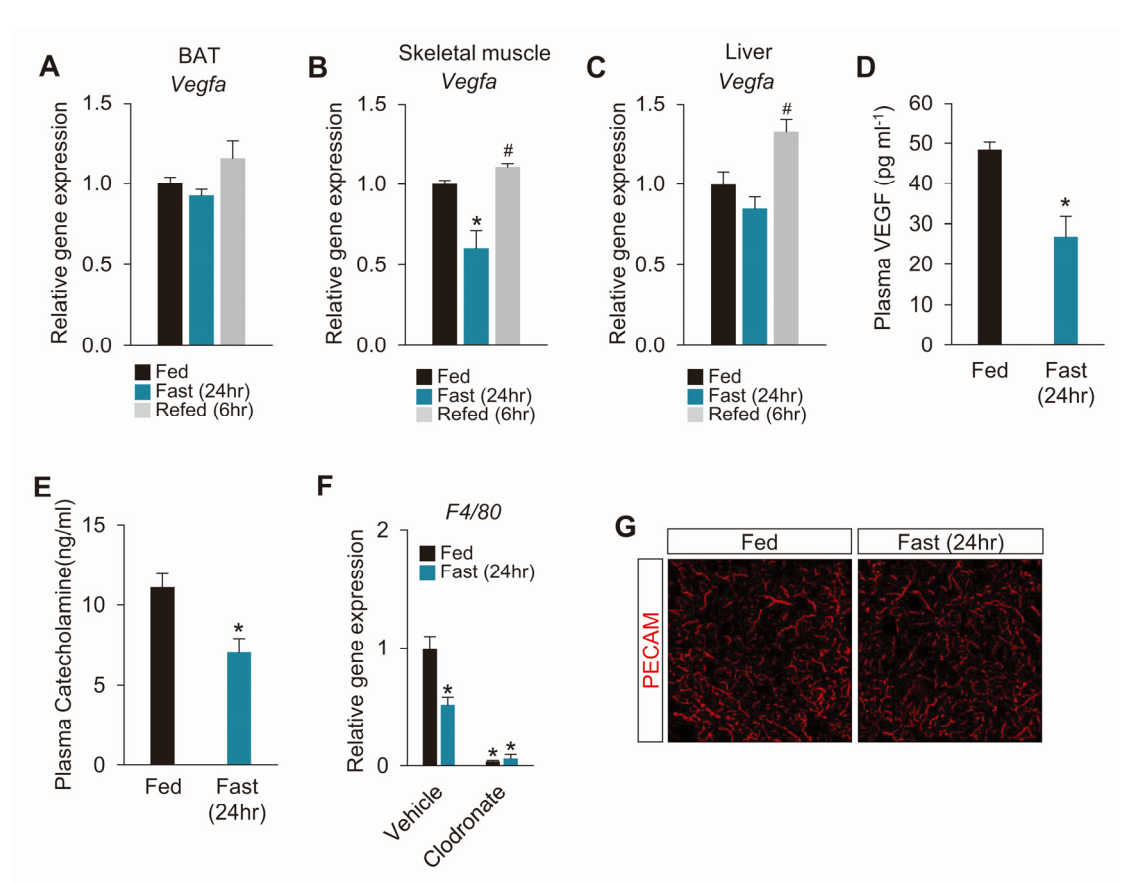

**Figure S7 Fasting induces adipose-specific VEGF upregulation.** (A-C) *Vegfa* mRNA expression in BAT (A), skeletal muscle (B; i.e., quadriceps femoris), and liver (C) at feeding, 24 h fasting, and 6 h refeeding (n = 5 per group). (D) Plasma VEGF levels at feeding and 24 h fasting. (E) Plasma catecholamine levels at feeding and 24 h fasting. (F) *F4/80* gene expression verifying depletion of adipose macrophage upon clodronate injection. (G) Representative microscopic images of PECAM-stained blood vessels in whole-mount PWAT of fed and fasted (24 h) mice. Data are mean  $\pm$  SEM; one-way ANOVA with Student-Newman-Keuls *post-hoc* analysis and two-tailed unpaired Student's *t*-test; \**P* < 0.05 vs. Fed. #*P* < 0.05 vs. Fast (24 h).
