# Supplementary material for: Intermittent fasting promotes adipose thermogenesis and metabolic homeostasis via VEGF-mediated alternative activation of macrophage
Source: PubMed Central journal article supplement (PMC5674160; doi:10.1038/cr.2017.126), 2017-10-17
Supplement: cr2017126x8.pdf [file cr2017126x8.pdf]

## Supplementary information, Figure S8

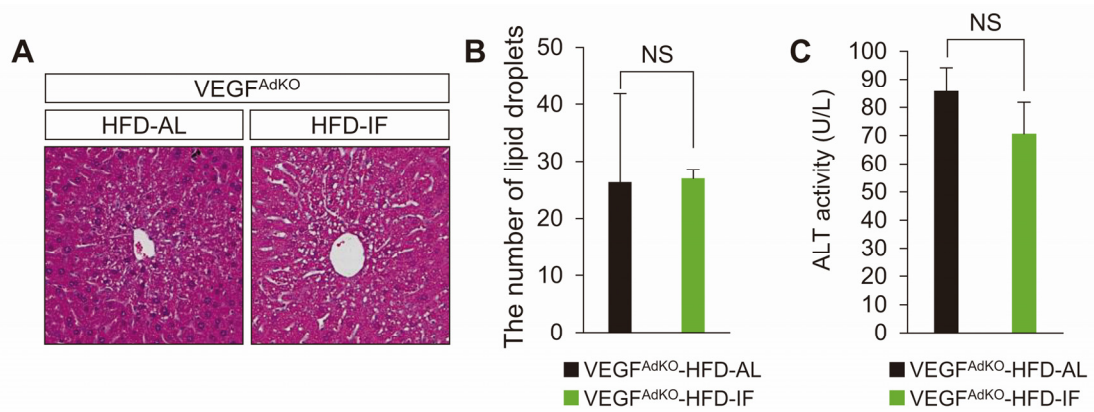

### Figure S8 Adipose-VEGF is required for IF-mediated metabolic benefits. (A)

Histological sections of VEGF<sup>AdKO</sup>-HFD-AL and -IF mouse liver. (B) The number of lipid droplets in liver of VEGF<sup>AdKO</sup>-HFD-AL and -IF mice. (C) Plasma alanine aminotransferase (ALT) activity. Values are mean  $\pm$  SEM; two-tailed unpaired Student's *t*-test; \**P* < 0.05 vs. VEGF<sup>AdKO</sup>-HFD-AL. NS, not significant.
