# Supplementary material for: Intermittent fasting promotes adipose thermogenesis and metabolic homeostasis via VEGF-mediated alternative activation of macrophage
Source: PubMed Central journal article supplement (PMC5674160; doi:10.1038/cr.2017.126), 2017-10-17
Supplement: cr2017126x9.pdf [file cr2017126x9.pdf]

## Supplementary information, Figure S9

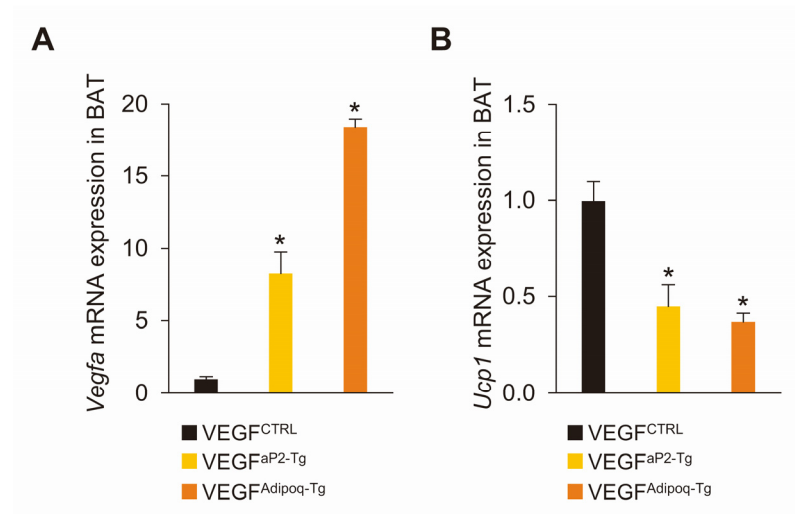

**Figure S9 Intermittent VEGF overexpression in BAT did not increase thermogenic activity in BAT. (A)** *Vegfa* mRNA expression in BAT of VEGF<sup>aP2-Tg</sup> and VEGF<sup>Adipoq-Tg</sup> mice showed successful VEGF overexpression in BAT. **(B)** *Ucp1* expression in BAT of VEGF<sup>aP2-Tg</sup> and VEGF<sup>Adipoq-Tg</sup> mice were significantly lower than control mice. Data are expressed as mean  $\pm$  SEM (VEGF<sup>CTRL</sup>: n = 10; VEGF<sup>aP2-Tg</sup>: n = 6; and VEGF<sup>Adipoq-Tg</sup>: n = 5); one or two-way ANOVA with Student-Newman-Keuls *post-hoc* analysis; \* $P$  < 0.05 vs. VEGF<sup>CTRL</sup>.
