# Supplementary material for: Intermittent fasting promotes adipose thermogenesis and metabolic homeostasis via VEGF-mediated alternative activation of macrophage
Source: PubMed Central journal article supplement (PMC5674160; doi:10.1038/cr.2017.126), 2017-10-17
Supplement: cr2017126x12.pdf [file cr2017126x12.pdf]

## Supplementary information, Figure S12

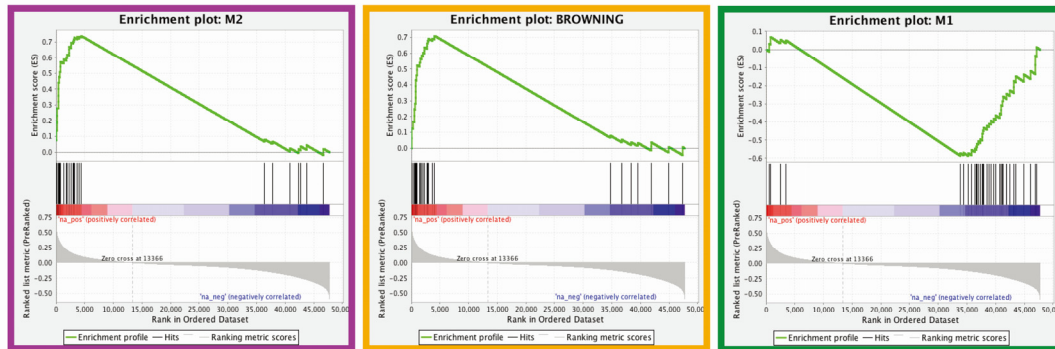

**Figure S12 VEGF expression in human WAT correlates with M2 macrophage and WAT browning.** Gene set enrichment plots show enrichment scores based on permutation tests of *VEGFA*-correlated M2, browning and M1 marker genes in human WAT.
